# Supplementary material for: Effects of Surgical and Dietary Weight Loss Therapy for Obesity on Gut Microbiota Composition and Nutrient Absorption
Source: Hindawi journal article supplement (doi:10.1155/2015/806248), 2015-01-01
Supplement: f1 [file 806248.f1.pdf]

## Supporting information 1: Figures

**SI-Figure 1:** Dissimilarity- and cluster analysis of the phylogenetic trees in the course of weight loss therapy for obesity derived from sequencing of the intestinal microbiome. (A) (red): Laparoscopic sleeve gastrectomy (subject numbers LSG 1-3), (B) (green): Very low calorie diet (subject numbers VLCD 1-3). The color code of the heatmap corresponds to values of the normalized Euclidian distances of the phylogenetic trees.

**(A) LSG**

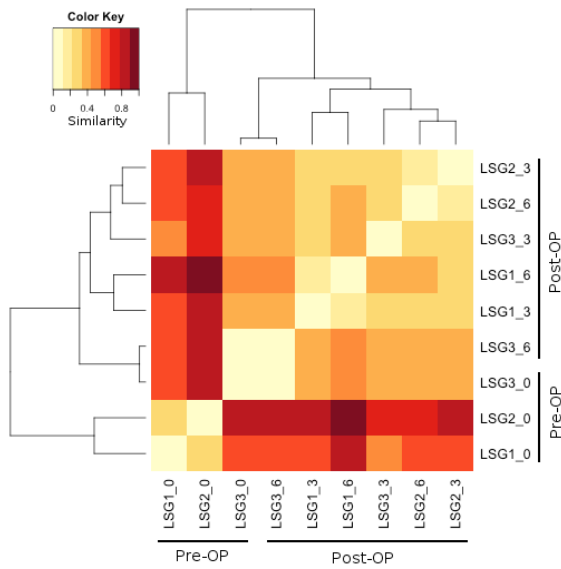

**(B) VLCD**

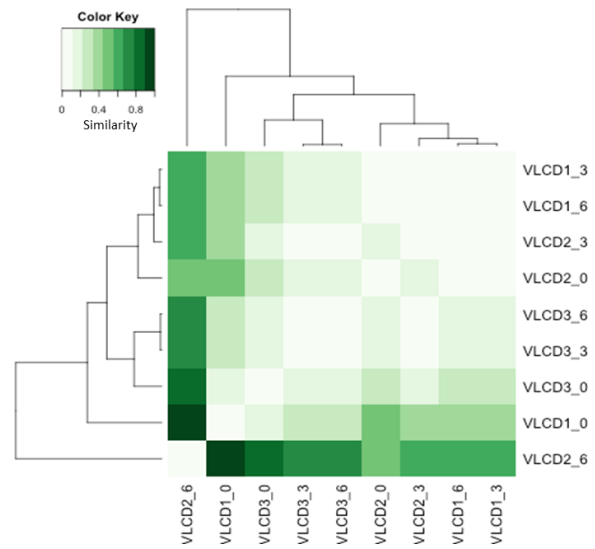

**SI-Figure 2:** OPLS-DA coefficient plots for identification of pre- to post-interventional gut microbial changes on all taxonomic levels during *Laparoscopic sleeve gastrectomy (LSG; SDC-Fig. 2a)* and *Very low calorie diet (VLCD; SDC-Fig. 2b)*. Labeled are bacterial groups with predictive OPLS coefficient  $p(\text{corr}) > 0.75$  and  $< -0.75$ , respectively, as indicated by the color code shown on the left.

**Fig. 2a) LSG**

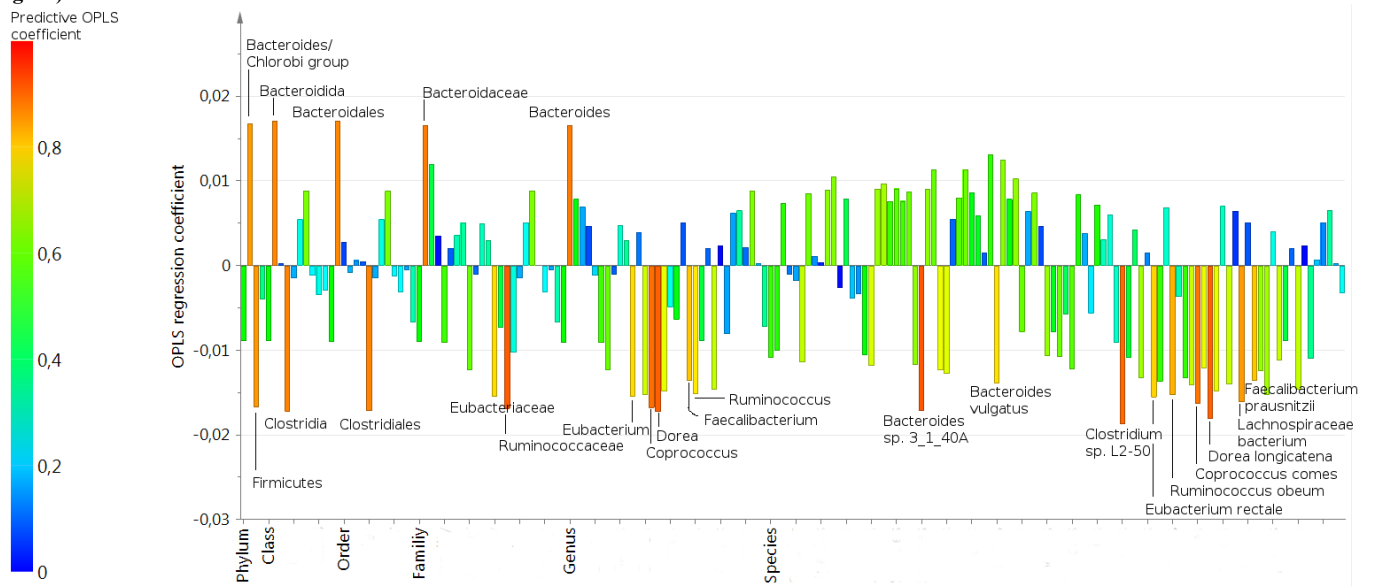

Model statistics:  $Q^2=0.337$ ,  $R^2X=0.265$

Fig. 2b) VLCD

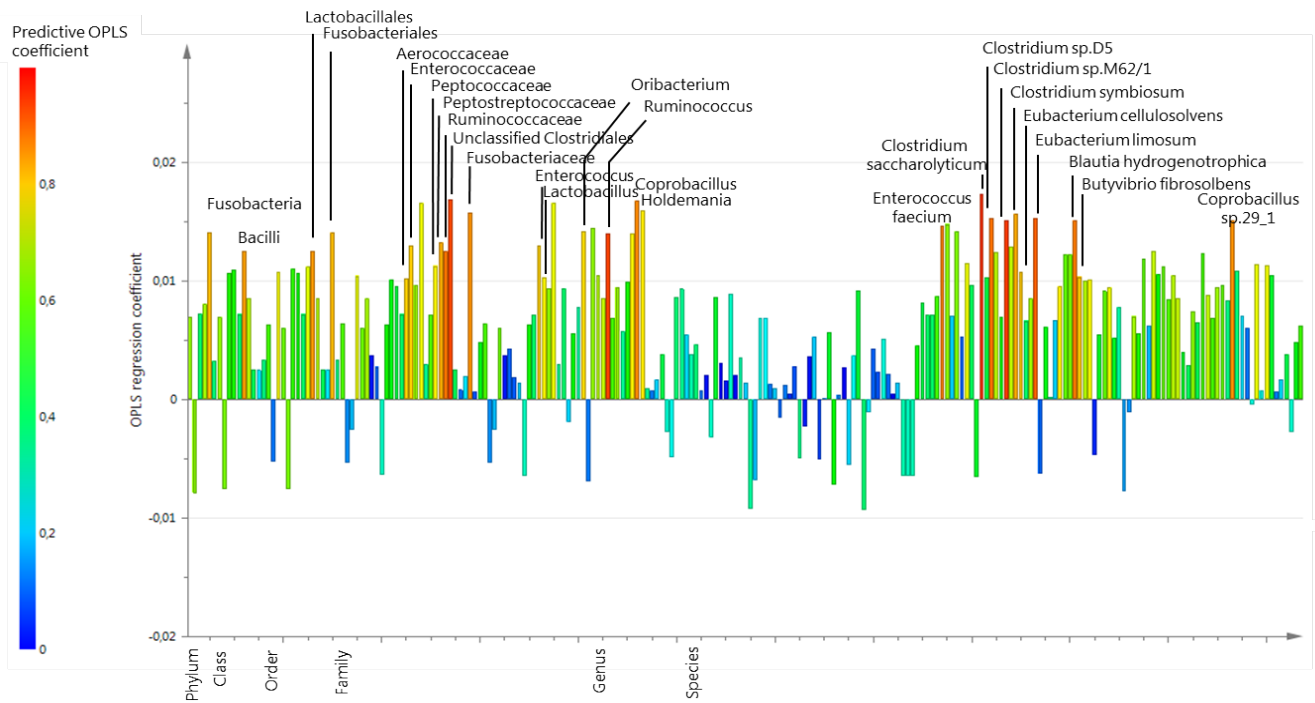

Model statistics:  $Q^2=0.56$ ,  $R^2X=0.216$

**SI-Figure 3:** Abundance of bacterial groups at the class level in 6 obese subjects undergoing weight loss therapy obtained by next-generation sequencing (SOLiD shotgun sequencing) during a period of 6 months (timepoints 0, 3, and 6 months): (A) *Laparoscopic sleeve gastrectomy* (subject numbers: LSG 1-3) and (B) *Very low calorie diet* (subject numbers: VLCD 1-3).

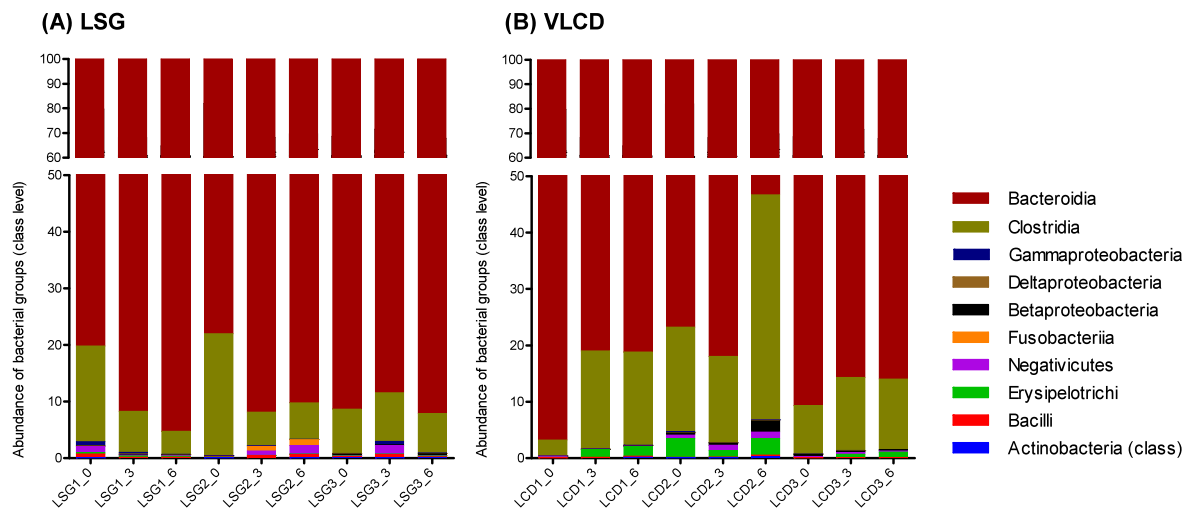

**SI-Figure 4:** KEGG analysis of the microbial metabolic capacity for primary and secondary bile acid synthesis after intervention with **laparoscopic sleeve gastrectomy** (*subject numbers LSG 1-3, timepoints 0, 3, and 6 months*). Only a section of the biosynthesis pathway is shown.

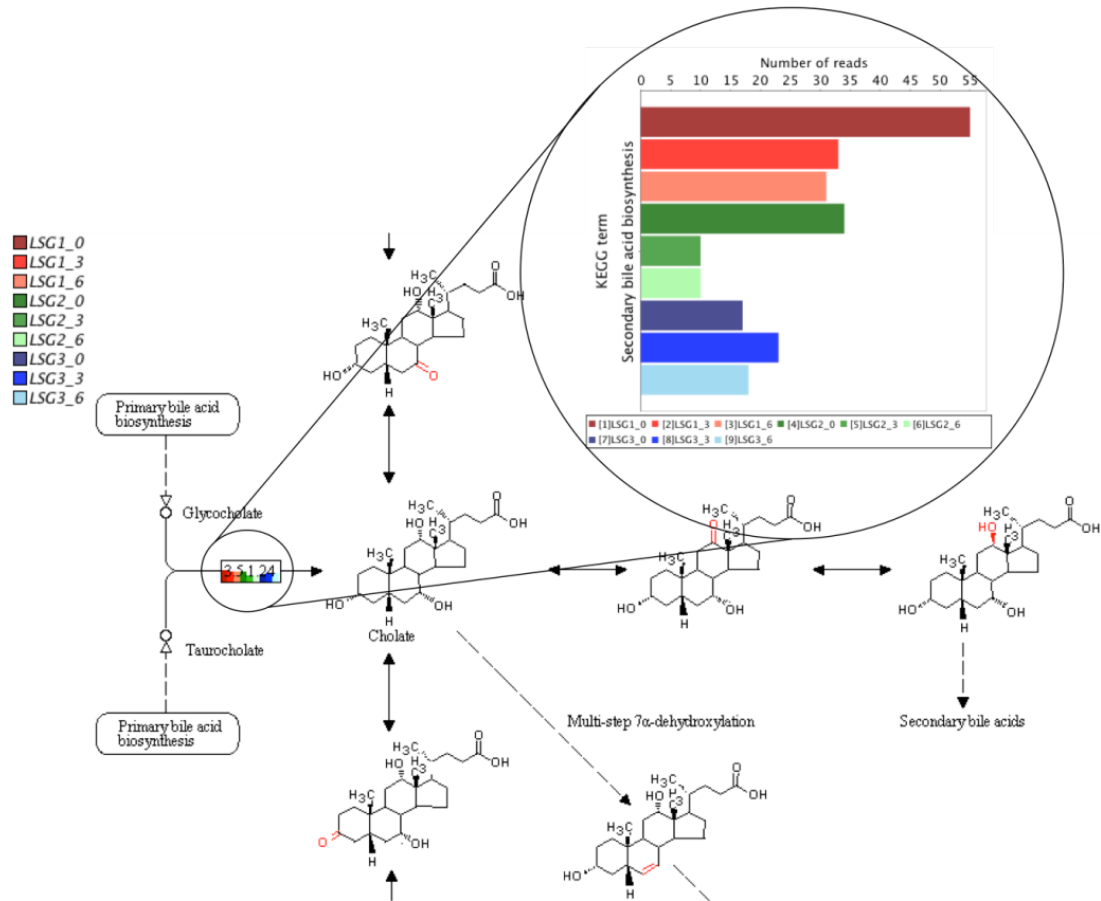

**SI-Figure 5** Correlation and cluster analysis of fecal bile acids with intestinal microbes, which changed following laparoscopic sleeve gastrectomy. Stars indicate significant correlations (\* $p < 0.05$ , \*\* $p < 0.01$ ). LCA, DCA: Secondary bile acids.

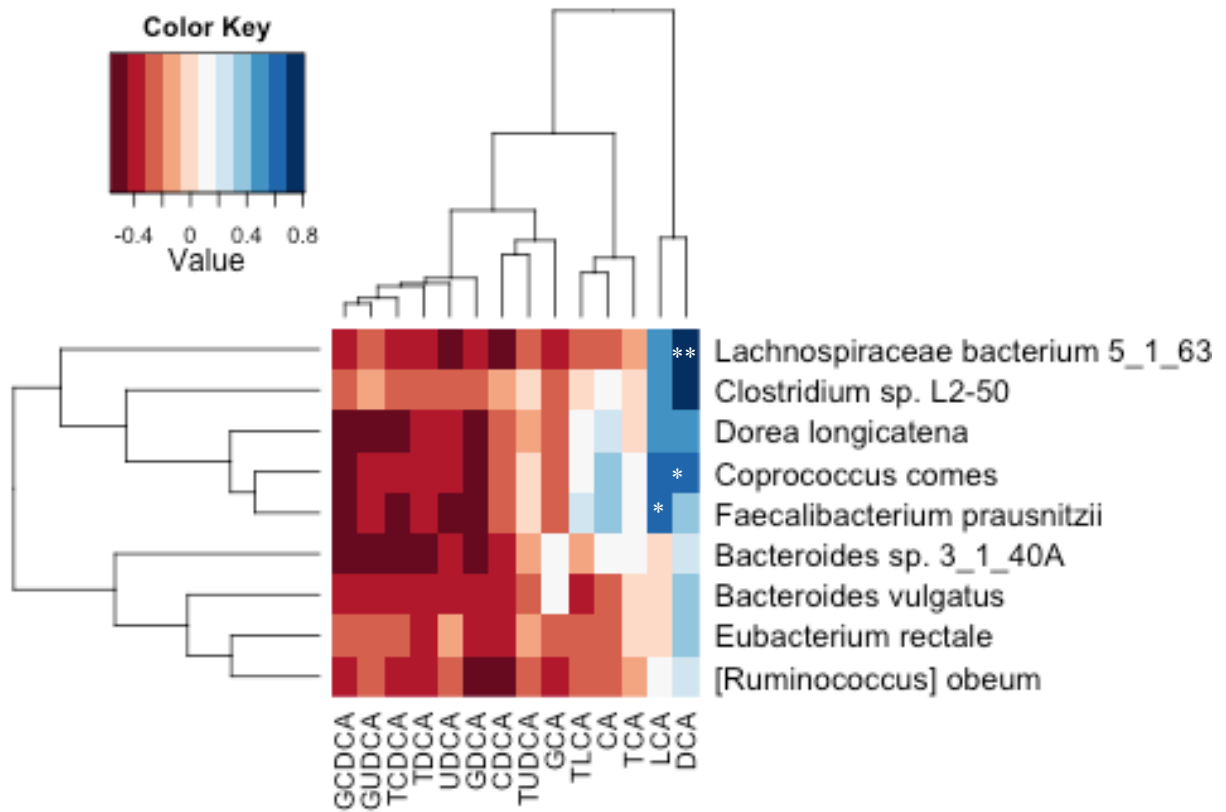

## Supporting information 2: Tables

**SI-Table 1:** Alterations of the intestinal microbiota on different taxonomic levels following a) laparoscopic sleeve gastrectomy and b) Very low calorie diet-induced weight loss in obese subjects

| Taxonomic level                                 | Bacteria category                               | Predictive coefficient <sup>a</sup> | P value <sup>b</sup> | Reads (normalized) Month 0 | Reads (normalized) Month 3 | Reads (normalized) Month 6 |
|-------------------------------------------------|-------------------------------------------------|-------------------------------------|----------------------|----------------------------|----------------------------|----------------------------|
| <b>a) Laparoscopic sleeve gastrectomy (LSG)</b> |                                                 |                                     |                      |                            |                            |                            |
| Phylum                                          | <i>Bacteroidetes/Chlorobi group</i>             | 0.8478                              | 0.1667               | 77128.3 ± 5700.4           | 85069 ± 2011.1             | 86482.7 ± 2382.6           |
|                                                 | <i>Firmicutes</i>                               | -0.8501                             | 0.0952               | 15858.0 ± 5434.9           | 8488.7 ± 2025.2            | 6784.7 ± 2027.3            |
| Class                                           | <i>Bacteroidia</i>                              | 0.8679                              | 0.1667               | 75474.0 ± 5478.8           | 83494.7 ± 2170.1           | 84630.3 ± 1998.5           |
|                                                 | <i>Clostridia</i>                               | -0.8725                             | 0.0476*              | 14014.0 ± 5215.9           | 6572.3 ± 1196.3            | 5333.0 ± 1415.7            |
| Order                                           | <i>Bacteroidales</i>                            | 0.8679                              | 0.1667               | 75474.0 ± 5478.8           | 83494.7 ± 2170.1           | 84630.3 ± 1998.5           |
|                                                 | <i>Clostridiales</i>                            | -0.8721                             | 0.0476*              | 13978.0 ± 5212.3           | 6669.0 ± 1196.1            | 5320.3 ± 1412.0            |
| Family                                          | <i>Bacteroidaceae</i>                           | 0.8790                              | 0.1667               | 64302.0 ± 3587.6           | 69971.0 ± 2504.2           | 70006.3 ± 1345.0           |
|                                                 | <i>Eubacteriaceae</i>                           | -0.7842                             | 0.1667               | 5075.7 ± 3959.9            | 259.0 ± 178.3              | 652.0 ± 412.8              |
|                                                 | <i>Ruminococcaceae</i>                          | -0.0908                             | 0.0476*              | 1386.3 ± 448.0             | 605.0 ± 322.7              | 539.7 ± 319.0              |
| Genus                                           | <i>Bacteroides</i>                              | -0.8790                             | 0.1667               | 64302.0 ± 3587.6           | 69971.0 ± 2504.2           | 70006.3 ± 1345.0           |
|                                                 | <i>Eubacterium</i>                              | -0.8784                             | 0.1667               | 5072.3 ± 3957.9            | 257.7 ± 178.8              | 650.7 ± 412.3              |
|                                                 | <b><i>Coprococcus</i><sup>s</sup></b>           | -0.8902                             | 0.0238*              | <b>397.0 ± 135.2</b>       | <b>116.3 ± 107.3</b>       | <b>154.7 ± 120.3</b>       |
|                                                 | <i>Dorea</i>                                    | -0.9061                             | 0.0238*              | 180.0 ± 28.3               | 72.7 ± 66.9                | 72.3 ± 49.7                |
|                                                 | <i>Faecalibacterium</i>                         | -0.8053                             | 0.2619               | 380.7 ± 48.7               | 163.3 ± 194.3              | 167.3 ± 196.7              |
|                                                 | <i>Ruminococcus</i>                             | -0.7700                             | 0.0476*              | 914.7 ± 506.3              | 357.7 ± 80.6               | 307.3 ± 140.7              |
| Species                                         | <i>Bacteroides sp.3_1_40A</i>                   | -0.9155                             | 0.0238*              | 304.3 ± 59.7               | 142.3 ± 68.5               | 150.0 ± 88.8               |
|                                                 | <i>Bacteroides vulgatus</i>                     | -0.7785                             | 0.0952               | 4731.7 ± 2283.9            | 1913.7 ± 1788.5            | 1814.0 ± 1481.3            |
|                                                 | <b><i>Clostridium sp. L2-50</i><sup>s</sup></b> | -0.8967                             | 0.0269*              | <b>50.3 ± 10.4</b>         | <b>18.3 ± 7.2</b>          | <b>27.7 ± 7.4</b>          |
|                                                 | <i>Eubacterium rectale</i>                      | -0.7927                             | 0.1667               | 4370.0 ± 3501.9            | 103.7 ± 119.4              | 383.7 ± 486.8              |
|                                                 | <i>Ruminococcus obeum</i>                       | -0.8239                             | 0.0476*              | 143.0 ± 81.1               | 53.3 ± 36.5                | 33.0 ± 8.5                 |
|                                                 | <i>Coprococcus comes</i>                        | -0.8842                             | 0.0952               | 269.7 ± 61.0               | 78.3 ± 79.1                | 124.3 ± 111.2              |
|                                                 | <i>Dorea longicatena</i>                        | -0.9053                             | 0.0238*              | 132.0 ± 17.1               | 43.7 ± 38.5                | 53.0 ± 42.6                |
|                                                 | <i>Lachnospiraceae bacterium 5_1_63FAA</i>      | -0.8476                             | 0.1667               | 65.3 ± 40.5                | 14.3 ± 11.4                | 11.3 ± 4.7                 |
|                                                 | <i>Faecalibacterium prausnitzii</i>             | -0.8053                             | 0.2619               | 380.7 ± 48.7               | 163.3 ± 194.3              | 167.3 ± 196.7              |

| Taxonomic level                        | Bacteria category                               | Predictive coefficient <sup>a</sup> | P value <sup>b</sup> | Reads (normalized) Month 0 | Reads (normalized) Month 3 | Reads (normalized) Month 6 |
|----------------------------------------|-------------------------------------------------|-------------------------------------|----------------------|----------------------------|----------------------------|----------------------------|
| <b>b) Very low calorie diet (VLCD)</b> |                                                 |                                     |                      |                            |                            |                            |
| Phylum                                 | <i>Fusobacteria</i> <sup>§</sup>                | 0.8155                              | 0.0476*              | <b>39.0 ± 46.2</b>         | <b>97.7 ± 20.5</b>         | <b>107.0 ± 16.7</b>        |
| Class                                  | <i>Bacilli</i> <sup>§</sup>                     | 0.8429                              | 0.0238*              | <b>609.3 ± 319.8</b>       | <b>1519.0 ± 375.4</b>      | <b>2400.7 ± 1150.7</b>     |
| Order                                  | <i>Lactobacillales</i> <sup>§</sup>             | 0.8479                              | 0.0238*              | <b>485.7 ± 210.1</b>       | <b>1257.3 ± 385.7</b>      | <b>1966.7 ± 954.6</b>      |
|                                        | <i>Fusobacteriales</i> <sup>§</sup>             | 0.8155                              | 0.0476*              | <b>39.0 ± 46.2</b>         | <b>97.7 ± 20.5</b>         | <b>107.0 ± 16.7</b>        |
| Family                                 | <i>Aerococcaceae</i>                            | 0.7963                              | 0.2619               | 46.0 ± 68.7                | 100.7 ± 10.5               | 183.3 ± 105.6              |
|                                        | <i>Enterococcaceae</i> <sup>§</sup>             | 0.7954                              | 0.0238*              | <b>85.7 ± 74.2</b>         | <b>348.7 ± 162.4</b>       | <b>482.7 ± 256.8</b>       |
|                                        | <i>Peptococcaceae</i>                           | 0.7586                              | 0.2619               | 27.3 ± 33.0                | 67.0 ± 15.1                | 90.0 ± 52.0                |
|                                        | <i>Peptostreptococcaceae</i> <sup>§</sup>       | 0.8301                              | 0.0238*              | <b>92.7 ± 94.0</b>         | <b>263.3 ± 10.6</b>        | <b>471.7 ± 174.8</b>       |
|                                        | <i>Ruminococcaceae</i> <sup>§</sup>             | 0.8842                              | 0.0238*              | <b>9498.7 ± 8154.5</b>     | <b>28360.0 ± 7046.3</b>    | <b>52656.3 ± 24157.4</b>   |
|                                        | <i>UnclassifiedRum Clostridiales</i>            | 0.9275                              | 0.0238*              | 1262.0 ± 446.0             | 3158.0 ± 172.6             | 3179.3 ± 706.3             |
|                                        | <i>Fusobacteriaceae</i> <sup>§</sup>            | 0.8557                              | 0.0238*              | <b>31.0 ± 33.2</b>         | <b>90.0 ± 14.1</b>         | <b>95.3 ± 9.6</b>          |
| Genus                                  | <i>Enterococcus</i> <sup>§</sup>                | 0.7940                              | 0.0238*              | <b>85.7 ± 74.2</b>         | <b>347.3 ± 163.7</b>       | <b>482.7 ± 256.8</b>       |
|                                        | <i>Lactobacillus</i> <sup>§</sup>               | 0.7583                              | 0.0476*              | <b>27.3 ± 32.3</b>         | <b>83.0 ± 19.9</b>         | <b>204.0 ± 131.5</b>       |
|                                        | <i>Oribacterium</i>                             | 0.7832                              | 0.0238*              | 36.7 ± 36.5                | 131.3 ± 58.0               | 141.3 ± 45.7               |
|                                        | <i>Ruminococcus</i>                             | 0.9321                              | 0.0476*              | 6951.3 ± 6549.9            | 20517 ± 6500.0             | 34982.3 ± 8870.5           |
|                                        | <i>Coprobacillus</i>                            | 0.8627                              | 0.0238*              | 107.7 ± 98.7               | 711.0 ± 110.1              | 800.7 ± 251.9              |
|                                        | <i>Holdemania</i>                               | 0.7672                              | 0.0238*              | 48.7 ± 42.3                | 406.0 ± 154.9              | 357.7 ± 101.2              |
| Species                                | <i>Enterococcus faecium</i>                     | 0.8705                              | 0.0238*              | 49.3 ± 45.0                | 215.3 ± 113.8              | 265.7 ± 69.8               |
|                                        | <i>Clostridium saccharolyticum</i> <sup>§</sup> | 0.9435                              | 0.0238*              | <b>160.3 ± 49.0</b>        | <b>554.7 ± 130.5</b>       | <b>591.3 ± 56.0</b>        |
|                                        | <i>Clostridium sp. D5</i>                       | 0.8852                              | 0.0238*              | 79.0 ± 68.7                | 521.3 ± 233.8              | 594.3 ± 206.2              |
|                                        | <i>Clostridium sp. M62/1</i>                    | 0.9416                              | 0.0238*              | 348.3 ± 315.2              | 909.7 ± 160.6              | 1033.7 ± 232.1             |
|                                        | <i>Clostridium symbiosum</i>                    | 0.8330                              | 0.0238*              | 299.7 ± 147.7              | 1690.3 ± 798.0             | 1685.7 ± 327.8             |
|                                        | <i>Eubacterium cellulosolvens</i> <sup>§</sup>  | 0.7998                              | 0.0952               | 36.0 ± 35.5                | 120.3 ± 80.1               | 224.0 ± 141.2              |
|                                        | <i>Eubacterium limosum</i>                      | 0.9025                              | 0.0238*              | 24.0 ± 25.6                | 105.0 ± 38.0               | 103.0 ± 28.1               |
|                                        | <i>Blautia hydrogenotrophica</i>                | 0.8775                              | 0.0238*              | 96.7 ± 55.2                | 293.7 ± 30.6               | 294.7 ± 124.6              |
|                                        | <i>Butyrivibrio fibrisolvens</i>                | 0.8039                              | 0.1667               | 35.0 ± 39.0                | 73.0 ± 38.0                | 131.7 ± 66.2               |
|                                        | <i>Coprobacillus sp. 29_1</i>                   | 0.8558                              | 0.0238*              | 94.0 ± 83.8                | 509.3 ± 113.2              | 663.7 ± 289.9              |

Shown are coefficients > 0.75 and < -0.75; <sup>a</sup> derived from OPLS-DA models (LSG: Q<sup>2</sup>=0.337, R<sup>2</sup>X=0.265, VLCD: Q<sup>2</sup>=0.56, R<sup>2</sup>X=0.216) with class discrimination pre (Month 0) to post (Month 3 and 6 combined) intervention; <sup>b</sup> Mann-Whitney-U Test comparing pre- to post-intervention; <sup>§</sup> (bold) significant changes (p=0.0278) for time course (Friedman test)
